# Supplementary material for: Novel OBP genes similar to hamster Aphrodisin in the bank vole, Myodes glareolus
Source: PubMed Central journal article supplement (PMC2824723; doi:10.1186/1471-2164-11-45), 2010-01-19
Supplement: 1471-2164-11-45-S1.pdf [file 1471-2164-11-45-S1.pdf]

## Final Results of Mascot MS/MS Ion Search

Search was done against library of DNA derived Obp sequences. Obp3-A and Obp3-B sequences contained amino acid corrections proposed by manual processing of MS/MS data  
Limit value score was 26

### Salivary sample

#### Obp2

##### MALDI-MS/MS

| Seq. region | Observed | Mr(expt) | Mr(calc) | ppm | Miss | Score | Expect   | Rank | Peptide                                                                  |
|-------------|----------|----------|----------|-----|------|-------|----------|------|--------------------------------------------------------------------------|
| 81 - 92     | 1483.79  | 1482.78  | 1482.76  | 14  | 2    | 35    | 0.0028   | 1    | K.VIGYRQEDGKYR.T                                                         |
| 64 - 80     | 1921.84  | 1920.83  | 1920.83  | -2  | 0    | 138   | 1.3e-013 | 1    | K.MGVTFYVNANGQCSETK.V + Carbamidomethyl (C); Oxidation (M)               |
| 134 - 150   | 2007.00  | 2006.00  | 2006.00  | -2  | 1    | 62    | 7.3e-006 | 1    | K.GQPLTPEQYEKLEEFK.E                                                     |
| 29 - 49     | 2332.12  | 2331.11  | 2331.11  | 3   | 0    | 185   | 5.4e-018 | 1    | K.WVTTAIAADNIDTIEEEGPMR.I                                                |
| 64 - 85     | 2494.19  | 2493.18  | 2493.18  | 1   | 1    | 77    | 3.2e-007 | 1    | K.MGVTFYVNANGQCSETKVIGYR.Q + Carbamidomethyl (C)                         |
| 93 - 116    | 2790.34  | 2789.33  | 2789.34  | -5  | 1    | 74    | 7.4e-007 | 1    | R.TQFEGDNRFPVHATPENIVFTNK.N                                              |
| 22 - 49     | 3070.45  | 3069.45  | 3069.46  | -5  | 1    | 256   | 5.3e-025 | 1    | A <sub>2</sub> QAELEGKVVTTAIAADNIDTIEEEGPMR.I + Gln->pyro-Glu (N-term Q) |
| 134 - 160   | 3144.57  | 3143.57  | 3143.58  | -4  | 2    | 203   | 1.1e-019 | 1    | K.GQPLTPEQYEKLEEFKQGGIPTENIR.E                                           |

##### LC-MS/MS

| Seq. region | Observed | Mr(expt) | Mr(calc) | Delta | Miss | Score | Expect   | Rank | Peptide                                                                     |
|-------------|----------|----------|----------|-------|------|-------|----------|------|-----------------------------------------------------------------------------|
| 22 - 28     | 379.2    | 756.3    | 756.4    | -0.1  | 0    | 28    | 0.054    | 1    | A <sub>2</sub> QAELEGK.W + Gln->pyro-Glu (N-term Q)                         |
| 127 - 133   | 388.2    | 774.5    | 774.5    | 0.0   | 0    | 31    | 0.031    | 1    | K.LIFVVGK.G                                                                 |
| 145 - 160   | 625.3    | 1872.8   | 1873.0   | -0.1  | 1    | 55    | 0.00015  | 1    | K.LEEFAKQGGIPTENIR.E                                                        |
| 64 - 80     | 641.6    | 1921.7   | 1921.8   | -0.1  | 0    | 86    | 8.3e-008 | 1    | K.MGVTFYVNANGQCSETK.V + Carbamidomethyl (C); Deamidated (NQ); Oxidation (M) |
| 37 - 49     | 759.7    | 1517.4   | 1517.7   | -0.3  | 0    | 41    | 0.0036   | 1    | A.DNIDTIEEEGPMR.I                                                           |
| 68 - 80     | 759.8    | 1517.5   | 1517.6   | -0.2  | 0    | 45    | 0.0014   | 1    | T.FYVNANGQCSETK.V + Carbamidomethyl (C); Deamidated (NQ)                    |
| 34 - 49     | 887.3    | 1772.6   | 1772.8   | -0.2  | 0    | 82    | 3.8e-007 | 1    | A.IAADNIDTIEEEGPMR.I                                                        |
| 136 - 150   | 911.4    | 1820.7   | 1820.9   | -0.2  | 1    | 60    | 5.9e-005 | 1    | Q.PLTPEQYEKLEEFK.E                                                          |
| 101 - 116   | 921.9    | 1841.7   | 1841.9   | -0.2  | 0    | 41    | 0.0034   | 1    | R.FEPVHATPENIVFTNK.N                                                        |
| 33 - 49     | 922.8    | 1843.6   | 1843.9   | -0.3  | 0    | 67    | 9.4e-006 | 1    | T.AIAADNIDTIEEEGPMR.I                                                       |

#### Obp3 - A

##### MALDI-MS/MS

| Seq. region | Observed | Mr(expt) | Mr(calc) | ppm | Miss | Score | Expect   | Rank | Peptide                                               |
|-------------|----------|----------|----------|-----|------|-------|----------|------|-------------------------------------------------------|
| 79 - 92     | 1662.79  | 1661.78  | 1661.77  | 7   | 1    | 115   | 3.4e-012 | 1    | K.TTITGYMQEDGKYR.T                                    |
| 134 - 152   | 2292.16  | 2291.15  | 2291.14  | 5   | 2    | 139   | 1.3e-014 | 1    | K.GQPLTPEQYEKLEEFKAKER.N                              |
| 54 - 78     | 2836.25  | 2835.24  | 2835.26  | -6  | 1    | 239   | 1.3e-024 | 1    | R.ELTQSEGQCNKLGVTYVNANGQCSK.T + 3 Carbamidomethyl (C) |
| 22 - 49     | 3079.42  | 3078.41  | 3078.43  | -6  | 0    | 318   | 1.5e-032 | 1    | K.DAELEGTWYTTAIAADNVDTIEEEGPLR.L                      |
| 93 - 120    | 3245.57  | 3244.57  | 3244.59  | -7  | 1    | 101   | 8.8e-011 | 1    | R.TQFEGDDRFPVHATPDNIVFISQNVDR.A                       |
| 124 - 152   | 3364.75  | 3363.75  | 3363.77  | -8  | 3    | 277   | 2.2e-028 | 1    | R.TTNLIFVVGKQPLTPEQYEKLEEFKAKER.N                     |

##### LC-MS/MS

| Seq. region | Observed | Mr(expt) | Mr(calc) | Delta | Miss | Score | Expect   | Rank | Peptide                         |
|-------------|----------|----------|----------|-------|------|-------|----------|------|---------------------------------|
| 125 - 133   | 495.8    | 989.5    | 989.6    | -0.1  | 0    | 45    | 0.0012   | 1    | T.TNLIFVVGK.G                   |
| 124 - 133   | 546.3    | 1090.5   | 1090.6   | -0.1  | 0    | 56    | 4.5e-005 | 1    | R.TTNLIFVVGK.G                  |
| 111 - 120   | 595.8    | 1189.5   | 1189.6   | -0.1  | 0    | 27    | 0.043    | 1    | N.IVFISQNVDR.A                  |
| 22 - 32     | 643.2    | 1284.4   | 1284.6   | -0.1  | 0    | 59    | 2.8e-005 | 1    | K.DAELEGTWYTT.A                 |
| 134 - 144   | 645.3    | 1288.5   | 1288.6   | -0.1  | 0    | 37    | 0.0041   | 1    | K.GQPLTPEQYEK.L                 |
| 79 - 90     | 672.2    | 1342.4   | 1342.6   | -0.2  | 0    | 31    | 0.016    | 1    | K.TTITGYMQEDGK.Y                |
| 22 - 33     | 678.7    | 1355.5   | 1355.6   | -0.1  | 0    | 62    | 1.3e-005 | 1    | K.DAELEGTWYTTA.I                |
| 82 - 92     | 682.2    | 1362.4   | 1362.6   | -0.2  | 1    | 66    | 5.2e-006 | 1    | I.TGYMQEDGKYR.T + Oxidation (M) |
| 38 - 49     | 686.3    | 1370.6   | 1370.7   | -0.1  | 0    | 49    | 0.00025  | 1    | D.NVDTIEEEGPLR.L                |
| 136 - 152   | 702.9    | 2105.8   | 2106.1   | -0.3  | 2    | 61    | 1.9e-005 | 1    | Q.PLTPEQYEKLEEFKAKER.N          |
| 81 - 92     | 730.8    | 1459.5   | 1459.7   | -0.2  | 1    | 76    | 5.6e-007 | 1    | T.ITGYMQEDGKYR.T                |

|           |        |        |        |      |   |     |          |   |                                                                       |
|-----------|--------|--------|--------|------|---|-----|----------|---|-----------------------------------------------------------------------|
| 37 - 49   | 743.8  | 1485.5 | 1485.7 | -0.2 | 0 | 90  | 2.3e-008 | 1 | A.DNVDTIEEEGPLR.L                                                     |
| 134 - 146 | 766.3  | 1530.6 | 1530.8 | -0.1 | 1 | 31  | 0.018    | 1 | K.GQPLTPEQYKLE.E                                                      |
| 64 - 78   | 830.3  | 1658.5 | 1658.8 | -0.2 | 0 | 96  | 6.1e-009 | 1 | K.LGVTFYV <u>N</u> ANGQCSK.T + Carbamidomethyl (C); 2 Deamidated (NQ) |
| 79 - 92   | 831.8  | 1661.6 | 1661.8 | -0.2 | 1 | 110 | 2.3e-010 | 1 | K.TTITGYMQEDGKYR.T                                                    |
| 34 - 49   | 871.3  | 1740.7 | 1740.9 | -0.2 | 0 | 94  | 8.7e-009 | 1 | A.IAADNVDTIEEEGPLR.L                                                  |
| 33 - 49   | 906.8  | 1811.6 | 1811.9 | -0.3 | 0 | 103 | 1.1e-009 | 1 | T.AIAADNVDTIEEEGPLR.L                                                 |
| 136 - 150 | 911.3  | 1820.7 | 1820.9 | -0.2 | 1 | 85  | 7.5e-008 | 1 | Q.PLTPEQYKLEEFK.E                                                     |
| 134 - 150 | 1003.9 | 2005.8 | 2006.0 | -0.2 | 1 | 72  | 1.6e-006 | 1 | K.GQPLTPEQYKLEEFK.E                                                   |

Obp3 - B  
MALDI-MS/MS

| Seq. region | Observed | Mr(expt) | Mr(calc) | ppm | Miss | Score | Expect   | Rank | Peptide                                                                 |
|-------------|----------|----------|----------|-----|------|-------|----------|------|-------------------------------------------------------------------------|
| 79 - 92     | 1648.73  | 1647.72  | 1647.76  | -20 | 1    | 81    | 8.1e-009 | 1    | K.TTVTGYMQEDGKYR.T                                                      |
| 134 - 150   | 2006.95  | 2005.95  | 2006.00  | -27 | 1    | 74    | 4.2e-008 | 1    | K.GQPLTPEQYKLEEFK.E                                                     |
| 101 - 120   | 2297.14  | 2296.13  | 2296.20  | -28 | 0    | 52    | 6.5e-006 | 1    | R.FKPVHATPDNIVFISQNVDR.A                                                |
| 54 - 78     | 2836.10  | 2835.15  | 2835.26  | -40 | 1    | 102   | 6.4e-011 | 1    | R.ELT <u>C</u> SEG <u>C</u> NKLGVTFYVNANGQCSK.T + 3 Carbamidomethyl (C) |
| 22 - 49     | 3101.35  | 3100.34  | 3100.46  | -38 | 0    | 227   | 3.7e-023 | 1    | K.HAELEGTWYTTAIAADNVDTIEEEGPLR.L                                        |
| 134 - 160   | 3201.49  | 3200.48  | 3200.64  | -48 | 2    | 179   | 1.6e-018 | 1    | K.GQPLTPEQYKLEEFKQNIPTENIR.N                                            |
| 93 - 120    | 3245.48  | 3244.47  | 3244.59  | -38 | 1    | 145   | 4.1e-015 | 1    | R.TQFEGDDRFKPVHATPDNIVFISQNVDR.A                                        |

LC-MS/MS

| Seq. region | Observed | Mr(expt) | Mr(calc) | Delta | Miss | Score | Expect   | Rank | Peptide                                                               |
|-------------|----------|----------|----------|-------|------|-------|----------|------|-----------------------------------------------------------------------|
| 124 - 133   | 546.3    | 1090.5   | 1090.6   | -0.1  | 0    | 58    | 2.6e-005 | 1    | R.TTNLIFVVGK.G                                                        |
| 22 - 31     | 603.7    | 1205.4   | 1205.5   | -0.2  | 0    | 30    | 0.016    | 1    | K.HAELEGTWYT.T                                                        |
| 151 - 160   | 607.2    | 1212.5   | 1212.6   | -0.2  | 0    | 52    | 9.3e-005 | 1    | K.EQNIPTENIR.N                                                        |
| 68 - 78     | 644.7    | 1287.4   | 1287.6   | -0.1  | 0    | 62    | 1.3e-005 | 1    | T.FYVN <u>N</u> ANGQCSK.T + Carbamidomethyl (C); Deamidated (NQ)      |
| 134 - 144   | 645.2    | 1288.5   | 1288.6   | -0.2  | 0    | 45    | 0.00076  | 1    | K.GQPLTPEQYK.L                                                        |
| 22 - 32     | 654.2    | 1306.4   | 1306.6   | -0.1  | 0    | 42    | 0.001    | 1    | K.HAELEGTWYTT.A                                                       |
| 79 - 90     | 665.2    | 1328.4   | 1328.6   | -0.1  | 0    | 76    | 4.8e-007 | 1    | K.TTVTGYMQEDGKYR.T                                                    |
| 82 - 92     | 682.2    | 1362.4   | 1362.6   | -0.1  | 1    | 50    | 0.00019  | 1    | V.TGYMQEDGKYR.T + Oxidation (M)                                       |
| 38 - 49     | 686.2    | 1370.5   | 1370.7   | -0.2  | 0    | 48    | 0.00029  | 1    | D.NVDTIEEEGPLR.L                                                      |
| 22 - 33     | 689.7    | 1377.5   | 1377.6   | -0.1  | 0    | 55    | 5.3e-005 | 1    | K.HAELEGTWYTTA.I                                                      |
| 81 - 92     | 723.7    | 1445.5   | 1445.7   | -0.2  | 1    | 55    | 5.6e-005 | 1    | T.VTGYMQEDGKYR.T                                                      |
| 37 - 49     | 743.8    | 1485.5   | 1485.7   | -0.2  | 0    | 97    | 4.3e-009 | 1    | A.DNVDTIEEEGPLR.L                                                     |
| 101 - 120   | 766.3    | 2295.9   | 2296.2   | -0.3  | 0    | 62    | 1.6e-005 | 1    | R.FKPVHATPDNIVFISQNVDR.A                                              |
| 36 - 49     | 779.3    | 1556.6   | 1556.7   | -0.2  | 0    | 76    | 4.4e-007 | 1    | A.ADNVDTIEEEGPLR.L                                                    |
| 79 - 92     | 824.8    | 1647.6   | 1647.8   | -0.2  | 1    | 90    | 2.6e-008 | 1    | K.TTVTGYMQEDGKYR.T                                                    |
| 64 - 78     | 830.3    | 1658.6   | 1658.8   | -0.2  | 0    | 78    | 3.1e-007 | 1    | K.LGVTFYV <u>N</u> ANGQCSK.T + Carbamidomethyl (C); 2 Deamidated (NQ) |
| 34 - 49     | 871.3    | 1740.6   | 1740.9   | -0.2  | 0    | 99    | 2.5e-009 | 1    | A.IAADNVDTIEEEGPLR.L                                                  |
| 33 - 49     | 906.9    | 1811.7   | 1811.9   | -0.2  | 0    | 107   | 3.7e-010 | 1    | T.AIAADNVDTIEEEGPLR.L                                                 |
| 136 - 150   | 911.4    | 1820.7   | 1820.9   | -0.2  | 1    | 70    | 2.1e-006 | 1    | Q.PLTPEQYKLEEFK.E                                                     |
| 145 - 160   | 965.9    | 1929.8   | 1930.0   | -0.2  | 1    | 49    | 0.00027  | 1    | K.LEEFAKEQNIPTENIR.N                                                  |
| 134 - 150   | 1003.9   | 2005.8   | 2006.0   | -0.2  | 1    | 48    | 0.00033  | 1    | K.GQPLTPEQYKLEEFK.E                                                   |

Urinary sample

Obp2  
MALDI-MS/MS

| Seq. region | Observed | Mr(expt) | Mr(calc) | ppm | Miss | Score | Expect | Rank | Peptide |
|-------------|----------|----------|----------|-----|------|-------|--------|------|---------|
|-------------|----------|----------|----------|-----|------|-------|--------|------|---------|

|           |         |         |         |     |   |     |          |   |                                                                            |
|-----------|---------|---------|---------|-----|---|-----|----------|---|----------------------------------------------------------------------------|
| 81 - 92   | 1483.78 | 1482.77 | 1482.76 | 10  | 2 | 64  | 3.5e-006 | 1 | K.VIGYRQEDGKYR.T                                                           |
| 64 - 80   | 1921.84 | 1920.84 | 1920.83 | 1   | 0 | 127 | 1.8e-012 | 1 | K.MGVTFYVNVANGQCSETK.V + Carbamidomethyl (C); Oxidation (M)                |
| 134 - 150 | 2007.01 | 2006.00 | 2006.00 | 1   | 1 | 91  | 9.8e-009 | 1 | K.GQPLTPEQYKLEEFK.E                                                        |
| 29 - 49   | 2348.10 | 2347.10 | 2347.10 | -2  | 0 | 78  | 2.1e-007 | 1 | K.WVTTAIAADNIDTIEEGP.MR.I + Oxidation (M)                                  |
| 93 - 116  | 2790.34 | 2789.33 | 2789.34 | -4  | 1 | 104 | 7.6e-010 | 1 | R.TQFEGDNRFPVHATPENIVFTNK.N                                                |
| 22 - 49   | 3086.42 | 3085.41 | 3085.46 | -13 | 1 | 90  | 2.3e-008 | 1 | A.QAELEGKWVTTAIAADNIDTIEEGP.MR.I + Gln->pyro-Glu (N-term Q); Oxidation (M) |
| 134 - 160 | 3144.56 | 3143.55 | 3143.58 | -9  | 2 | 243 | 1.3e-023 | 1 | K.GQPLTPEQYKLEEFK.EQGIPTENIR.E                                             |
| 93 - 120  | 3274.53 | 3273.53 | 3273.58 | -16 | 2 | 36  | 0.0051   | 1 | R.TQFEGDNRFPVHATPENIVFTNK.NVDR.T                                           |
| 86 - 116  | 3666.69 | 3665.69 | 3665.75 | -17 | 3 | 35  | 0.007    | 1 | R.QEDGKYRTQFEGDNRFPVHATPENIVFTNK.N                                         |

LC-MS/MS

| Seq. region | Observed | Mr(expt) | Mr(calc) | Delta | Miss | Score | Expect   | Rank | Peptide                                                                      |
|-------------|----------|----------|----------|-------|------|-------|----------|------|------------------------------------------------------------------------------|
| 127 - 133   | 388.2    | 774.4    | 774.5    | -0.1  | 0    | 55    | 5.7e-005 | 1    | K.LIFVVGK.G                                                                  |
| 151 - 160   | 578.8    | 1155.5   | 1155.6   | -0.1  | 0    | 34    | 0.0077   | 1    | K.EQGIPTENIR.E                                                               |
| 134 - 144   | 645.3    | 1288.5   | 1288.6   | -0.1  | 0    | 35    | 0.0077   | 1    | K.GQPLTPEQYK.L                                                               |
| 103 - 116   | 783.8    | 1565.7   | 1565.8   | -0.2  | 0    | 31    | 0.015    | 1    | E.PVHATPENIVFTNK.N                                                           |
| 34 - 49     | 895.3    | 1788.6   | 1788.8   | -0.2  | 0    | 103   | 9.1e-010 | 1    | A.IAADNIDTIEEGP.MR.I + Oxidation (M)                                         |
| 136 - 150   | 911.4    | 1820.7   | 1820.9   | -0.2  | 1    | 74    | 9.4e-007 | 1    | Q.PLTPEQYKLEEFK.E                                                            |
| 101 - 116   | 921.9    | 1841.7   | 1841.9   | -0.2  | 0    | 62    | 1.4e-005 | 1    | R.FEPVHATPENIVFTNK.N                                                         |
| 33 - 49     | 930.8    | 1859.7   | 1859.9   | -0.2  | 0    | 77    | 5.6e-007 | 1    | T.AIAADNIDTIEEGP.MR.I + Oxidation (M)                                        |
| 145 - 160   | 937.4    | 1872.8   | 1873.0   | -0.2  | 1    | 63    | 1.1e-005 | 1    | K.LEEFK.EQGIPTENIR.E                                                         |
| 64 - 80     | 961.8    | 1921.6   | 1921.8   | -0.2  | 0    | 109   | 1.8e-010 | 1    | K.MGVTFYVNVANGQCSETK.V + Carbamidomethyl (C); Deamidated (NQ); Oxidation (M) |

Obp3 - A  
MALDI-MS/MS

| Seq. region | Observed | Mr(expt) | Mr(calc) | ppm | Miss | Score | Expect   | Rank | Peptide                                                                 |
|-------------|----------|----------|----------|-----|------|-------|----------|------|-------------------------------------------------------------------------|
| 79 - 92     | 1678.79  | 1677.78  | 1677.77  | 8   | 1    | 63    | 5.3e-007 | 1    | K.TTITGYMQEDGKYR.T + Oxidation (M)                                      |
| 134 - 150   | 2007.01  | 2006.00  | 2006.00  | 2   | 1    | 76    | 2.3e-008 | 1    | K.GQPLTPEQYKLEEFK.E                                                     |
| 54 - 78     | 2837.26  | 2836.25  | 2836.25  | 2   | 1    | 204   | 3.7e-021 | 1    | R.ELTCSGCKNLGVTFYVNVANGQC.SK.T + 3 Carbamidomethyl (C); Deamidated (NQ) |
| 22 - 49     | 3079.43  | 3078.43  | 3078.43  | -1  | 0    | 266   | 2.7e-027 | 1    | K.DAELEGTWYTTAIAADNVDTIEEGPLR.L                                         |
| 93 - 120    | 3245.57  | 3244.56  | 3244.59  | -9  | 1    | 87    | 2.6e-009 | 1    | R.TQFEGDNRFPVHATPDNIVFISQNVDR.A                                         |

LC-MS/MS

| Seq. region | Observed | Mr(expt) | Mr(calc) | Delta | Miss | Score | Expect   | Rank | Peptide                                                        |
|-------------|----------|----------|----------|-------|------|-------|----------|------|----------------------------------------------------------------|
| 124 - 133   | 546.3    | 1090.5   | 1090.6   | -0.1  | 0    | 63    | 9.1e-006 | 1    | R.TTNLIFVVGK.G                                                 |
| 39 - 49     | 629.3    | 1256.5   | 1256.6   | -0.1  | 0    | 28    | 0.037    | 1    | N.VDTIEEGPLR.L                                                 |
| 83 - 92     | 631.6    | 1261.3   | 1261.5   | -0.3  | 1    | 34    | 0.016    | 1    | T.GYMQEDGKYR.T + Oxidation (M)                                 |
| 22 - 32     | 643.2    | 1284.4   | 1284.6   | -0.1  | 0    | 76    | 6.2e-007 | 1    | K.DAELEGTWYTTA.A                                               |
| 134 - 144   | 645.3    | 1288.5   | 1288.6   | -0.1  | 0    | 30    | 0.024    | 1    | K.GQPLTPEQYK.L                                                 |
| 22 - 33     | 678.7    | 1355.5   | 1355.6   | -0.1  | 0    | 82    | 1.5e-007 | 1    | K.DAELEGTWYTTA.I                                               |
| 82 - 92     | 682.2    | 1362.4   | 1362.6   | -0.2  | 1    | 54    | 9.1e-005 | 1    | I.TGYMQEDGKYR.T + Oxidation (M)                                |
| 38 - 49     | 686.3    | 1370.5   | 1370.7   | -0.1  | 0    | 72    | 1.4e-006 | 1    | D.NVDTIEEGPLR.L                                                |
| 136 - 152   | 703.0    | 2105.8   | 2106.1   | -0.2  | 2    | 36    | 0.0058   | 1    | Q.PLTPEQYKLEEFK.E.N                                            |
| 81 - 92     | 738.8    | 1475.5   | 1475.7   | -0.2  | 1    | 56    | 6.5e-005 | 1    | T.ITGYMQEDGKYR.T + Oxidation (M)                               |
| 37 - 49     | 743.8    | 1485.5   | 1485.7   | -0.2  | 0    | 75    | 7.6e-007 | 1    | A.DNVDTIEEGPLR.L                                               |
| 101 - 120   | 766.3    | 2295.9   | 2296.2   | -0.3  | 0    | 55    | 0.00016  | 1    | R.FKPVHATPDNIVFISQNVDR.A                                       |
| 36 - 49     | 779.3    | 1556.6   | 1556.7   | -0.2  | 0    | 80    | 2.2e-007 | 1    | A.ADNVDTIEEGPLR.L                                              |
| 35 - 49     | 814.8    | 1627.5   | 1627.8   | -0.2  | 0    | 64    | 8.1e-006 | 1    | I.AADNVDTIEEGPLR.L                                             |
| 64 - 78     | 830.3    | 1658.6   | 1658.8   | -0.2  | 0    | 110   | 2.6e-010 | 1    | K.LGVTFYVNVANGQC.SK.T + Carbamidomethyl (C); 2 Deamidated (NQ) |
| 79 - 92     | 839.8    | 1677.5   | 1677.8   | -0.2  | 1    | 70    | 2.5e-006 | 1    | K.TTITGYMQEDGKYR.T + Oxidation (M)                             |
| 34 - 49     | 871.3    | 1740.6   | 1740.9   | -0.3  | 0    | 99    | 3.1e-009 | 1    | A.IAADNVDTIEEGPLR.L                                            |
| 33 - 49     | 906.8    | 1811.6   | 1811.9   | -0.2  | 0    | 107   | 4.9e-010 | 1    | T.AIAADNVDTIEEGPLR.L                                           |
| 136 - 150   | 911.3    | 1820.6   | 1820.9   | -0.3  | 1    | 88    | 3.6e-008 | 1    | Q.PLTPEQYKLEEFK.E                                              |
| 134 - 150   | 1003.9   | 2005.7   | 2006.0   | -0.3  | 1    | 76    | 6.2e-007 | 1    | K.GQPLTPEQYKLEEFK.E                                            |
